# Supplementary material
Source: PubMed Central journal article supplement (PMC3910828)
Supplement: AAC.02025-13_zac002142599so1.pdf [file AAC.02025-13_zac002142599so1.pdf]

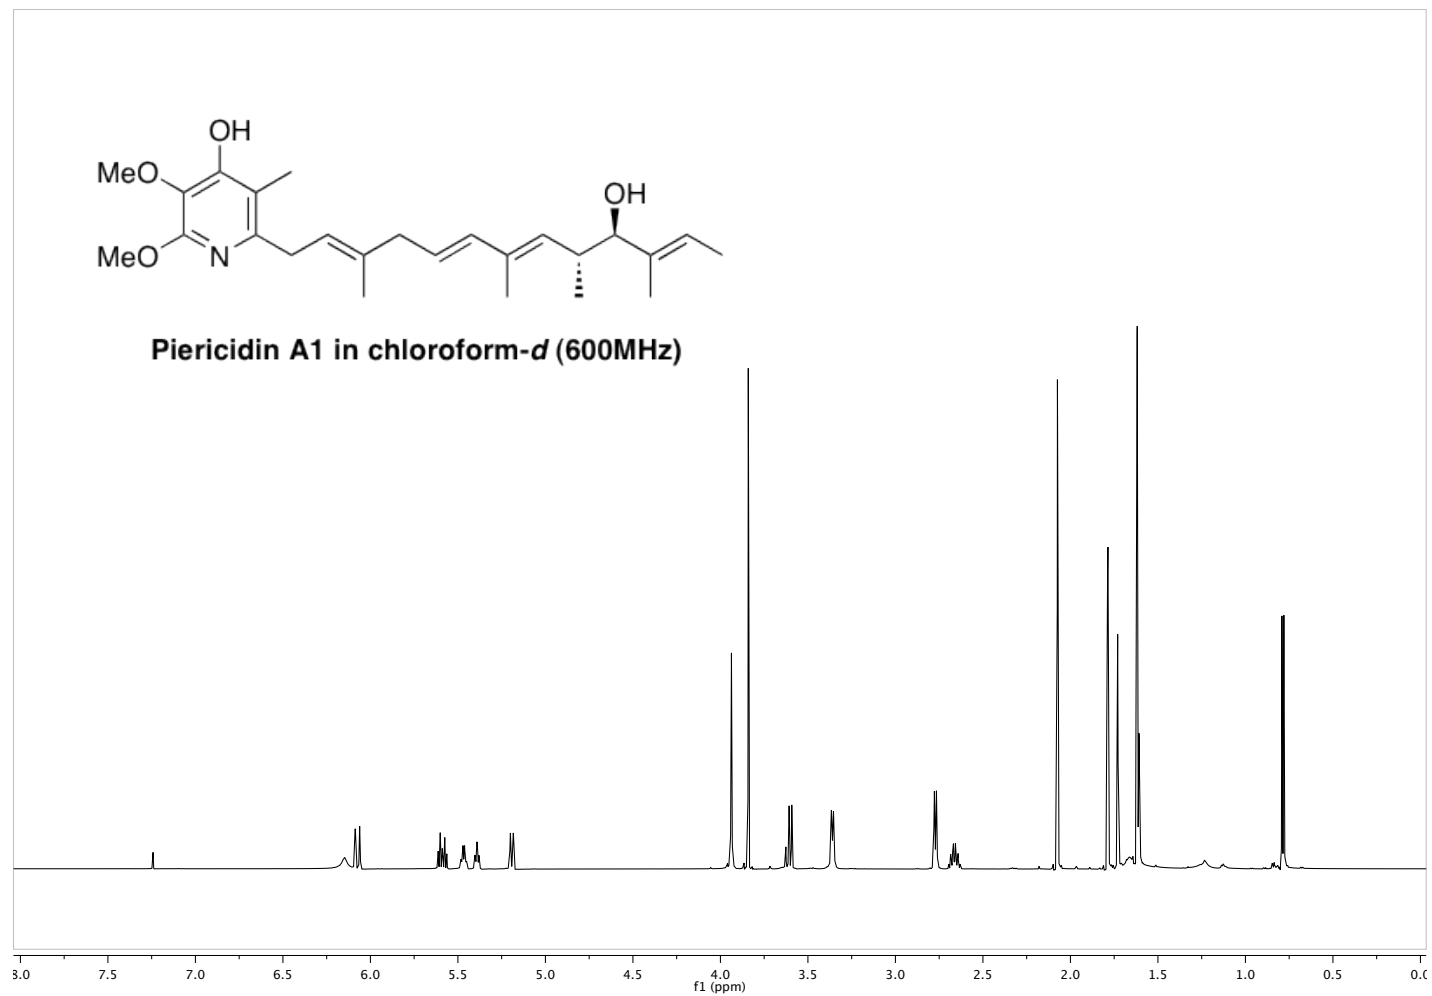

**Fig S2. One-dimensional  $^1\text{H}$  NMR spectrum for piericidin A1.**



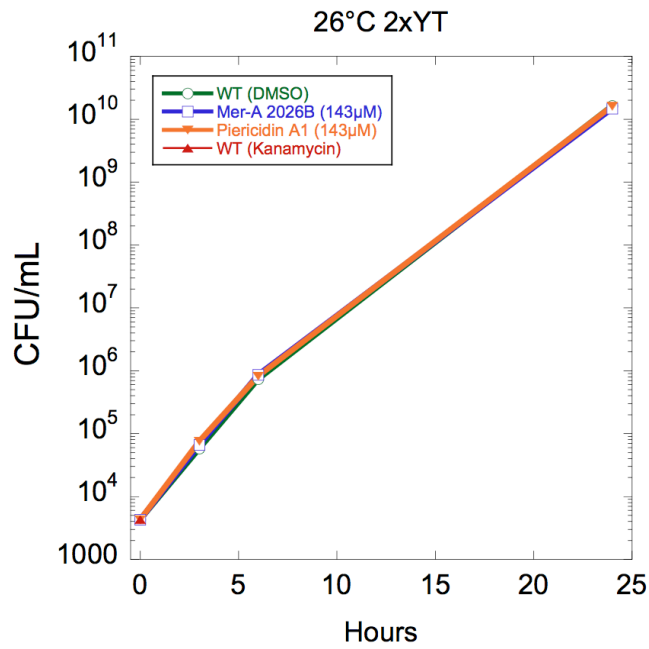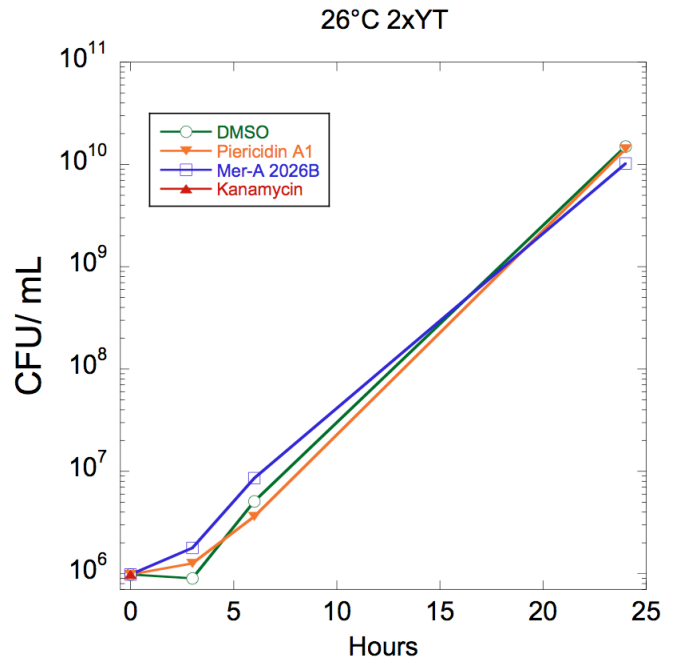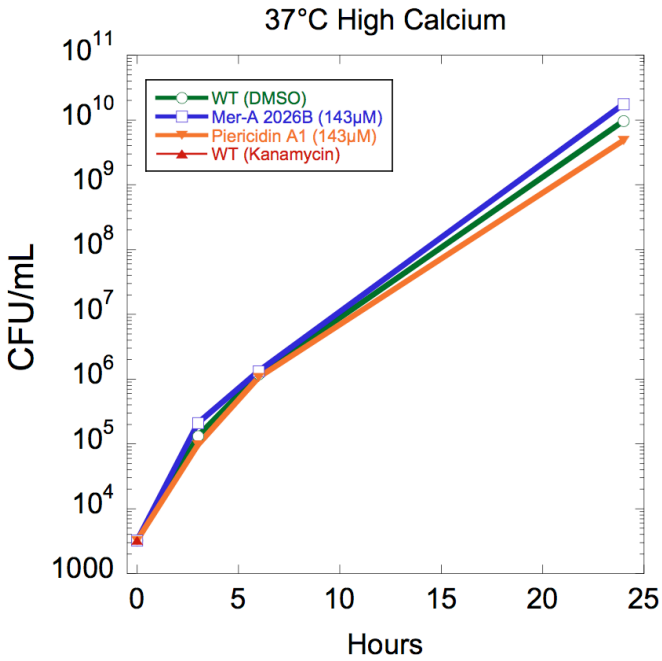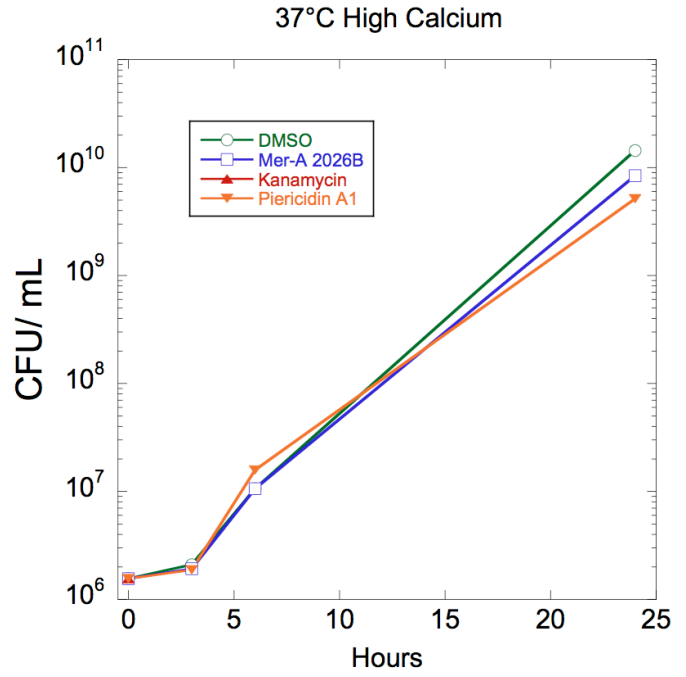

**Fig S4. Growth curves measured by serial dilution and plating for colony forming units (CFUs).** WT *Y. pseudotuberculosis* was grown for 24 hours with continuous shaking in the presence of DMSO, piericidins (143μM), or kanamycin. CFUs/ ml were measured at 0, 3, 6, and 24 hours of growth at 26°C and 37°C.

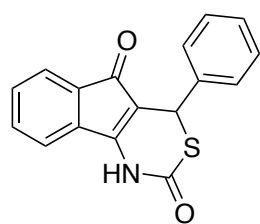

C15

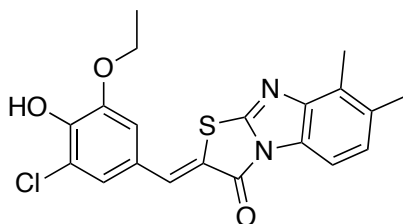

C22

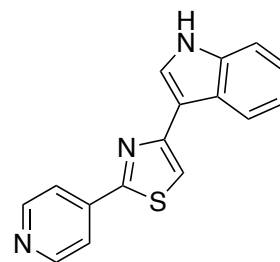

C24

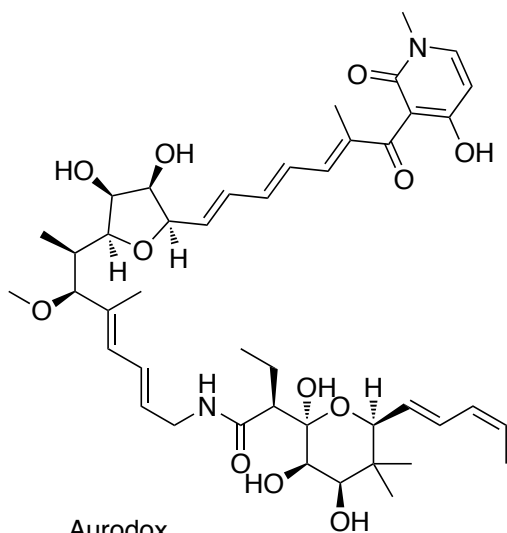

Aurodox

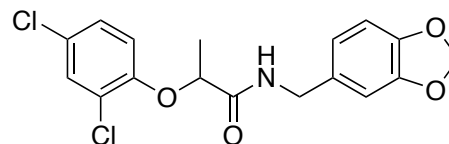

MBX1641

**Fig S5. Chemical structures of previously-discovered T3SS inhibitors used in this study.** The chemical structures of T3SS inhibitors used in the *in vitro* type III secretion assay for comparison to piericidins. C15, C22, and C24 were first published as T3SS inhibitors by Harmon *et al.* (16), Aurodox by Kimura *et al.* (21), and MBX1641 by Aiello *et al.* (17).
